# Supplementary material for: Synthesis of imatinib using greener solvents: a sustainable approach
Source: Royal Society of Chemistry journal article supplement (doi:10.1039/d5nj01768h), 2025-01-01
Supplement: d5nj01768h1.pdf [file d5nj01768h1.pdf]

## Supporting Information

### Synthesis of Imatinib in Greener Solvent: A Sustainable Approach

Atul K. Godha, <sup>a, b</sup> Nandeesh H.B, <sup>a</sup> Govindarajalu Gavara, <sup>a</sup> \* C.S. Karthik, <sup>b</sup> \* Ganesh Sambasivam <sup>a</sup>

<sup>a</sup> *Anthem Biosciences Pvt. Ltd., #49, Canara bank road, Bommasandra Industrial Area, Bommasandra, Bengaluru-560 099, Karnataka, India,*

<sup>b</sup> *Department of Chemistry, JSS Science and Technology University, Mysuru - 570 006, Karnataka, India.*

## **1. Experimental Section**

### **1.1 Material and methods**

All the commercial chemicals and reagents were purchased from Aldrich, BLD, TCI and used as such without further purification. <sup>1</sup>H (400 MHz, 300 MHz) and <sup>13</sup>C (100 MHz, 75 MHz) spectra were recorded on Bruker Avance 400 or 300 spectrometers. The chemical shifts (□ ppm) and coupling constants (Hz) are reported in the standard fashion with reference to internal tetramethylsilane or residual chloroform or DMSO. LCMS analysis were carried out using Agilent Technologies 1200 series instrument using direct inlet mode. Analytical thin-layer chromatography (TLC) were performed on pre-coated 0.2 mm thick Merck 60 F245 silica plates and various combinations of ethyl acetate, CH<sub>2</sub>Cl<sub>2</sub>, MeOH and hexanes were used as eluent. Visualization of spots was accomplished by exposure to iodine vapour. All compounds provide spectroscopic data consistent with being ≥ 95 % the assigned structure.

## 2. NMR and LCMS spectra of synthesized intermediates (22, 23) and Imatinib

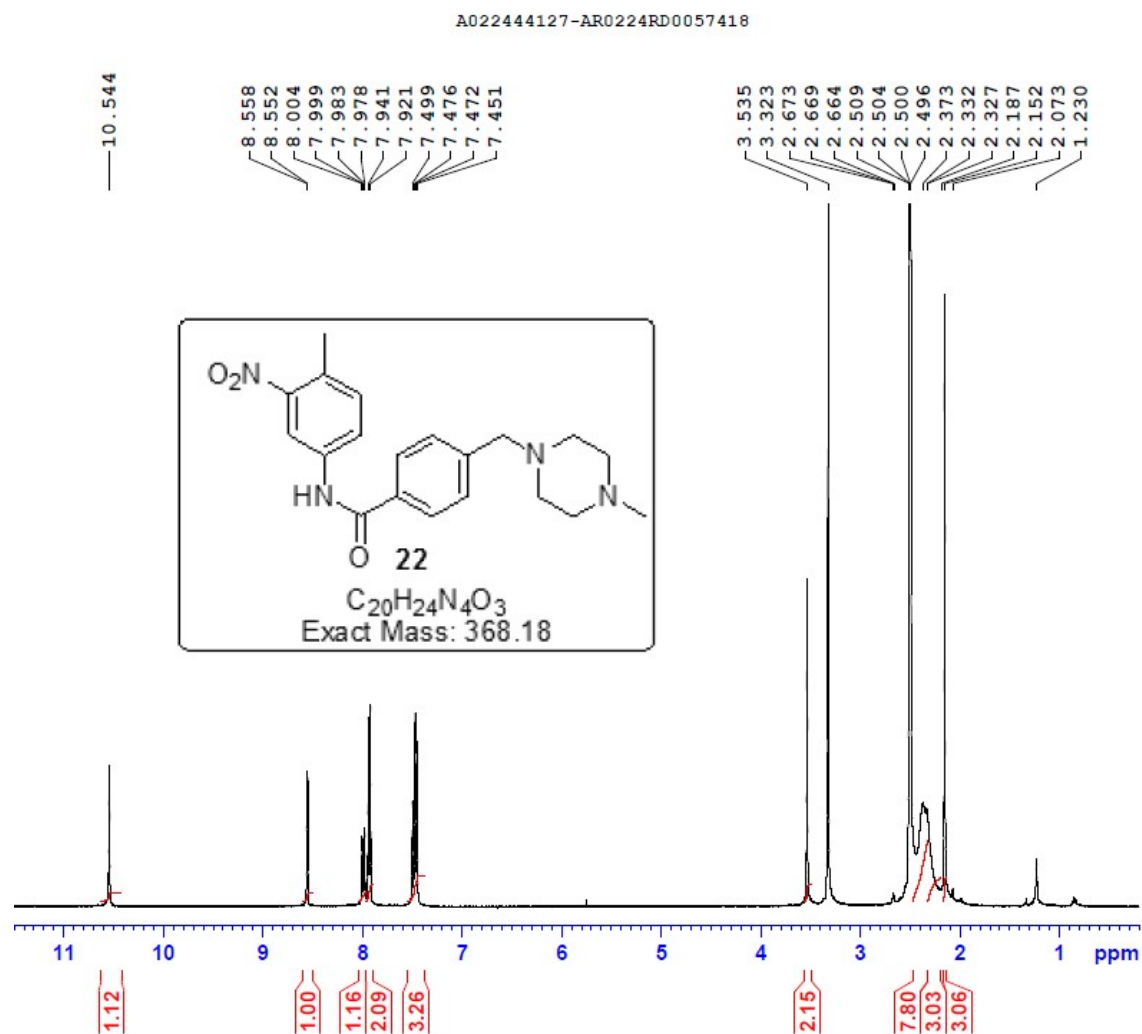

Figure S1:  $^1\text{H}$ -NMR of Intermediate-22 ( $\text{DMSO}-d_6$ )

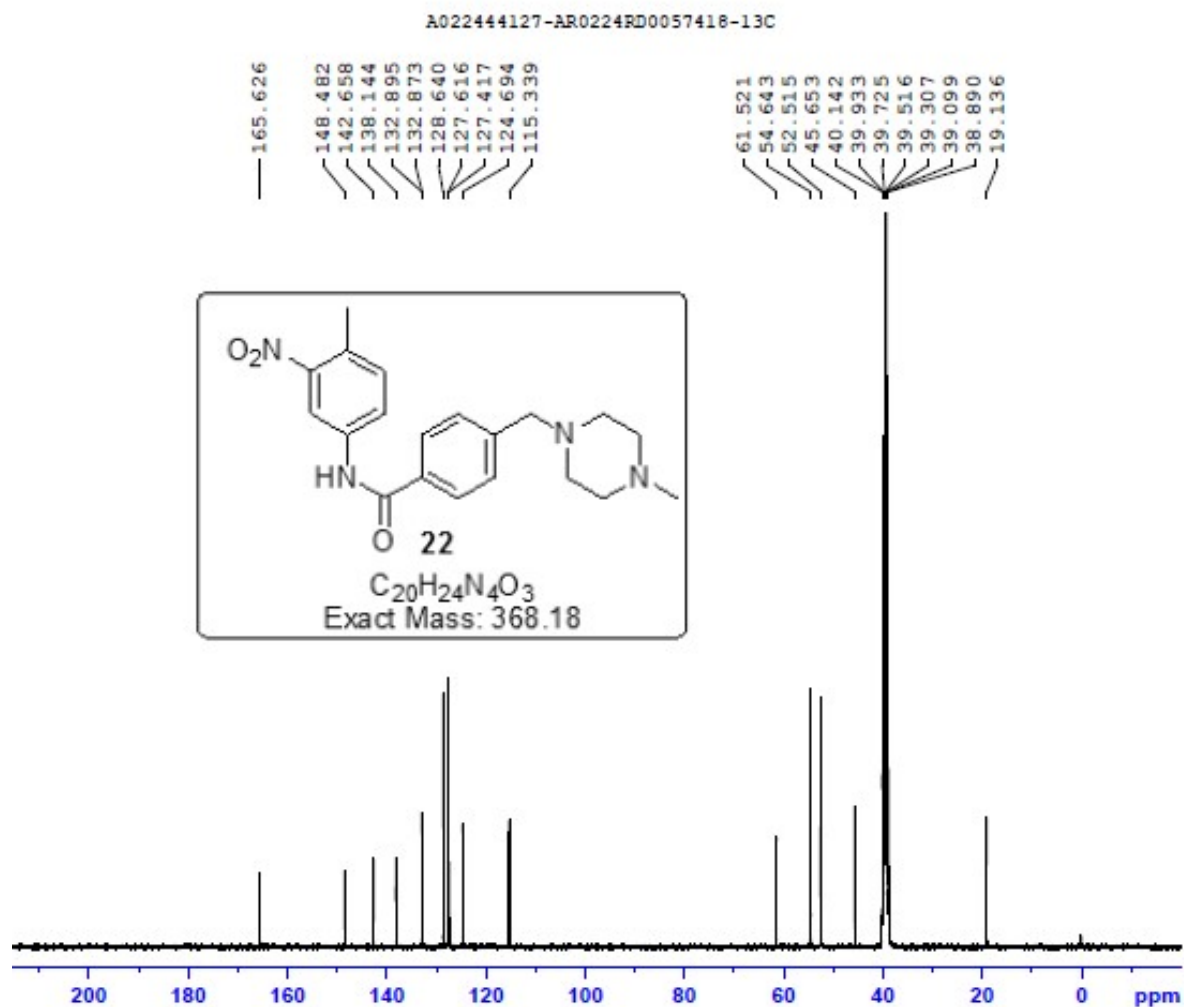

**Figure S2:  $^{13}\text{C}$ -NMR of Intermediate-22 ( $\text{DMSO}-d_6$ )**

Sample Name : A022444127  
 Location : Vial 39  
 Inj. Vol : 3 $\mu\text{L}$   
 Acq Method : IT-095-PA-2022.M  
 Data file : D:\DATA\JUN-2024\AR0224RD0057418-Q.D

Operator : KIRAN  
 Injection Date : 23-06-2024  
 Injection Time : 01:01:11

Sample Info :

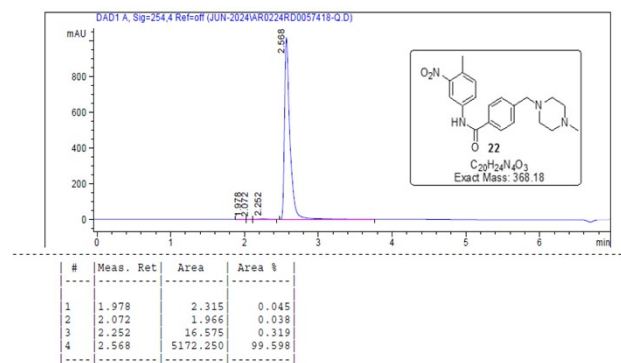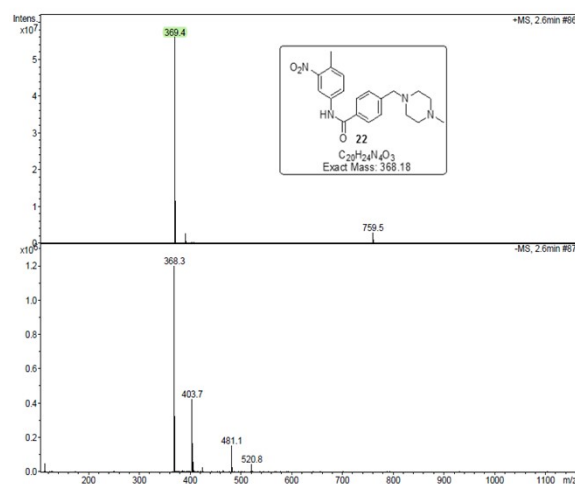

**Figure S3: LCMS of Intermediate-22**

A022442391-AR0224RD0036535

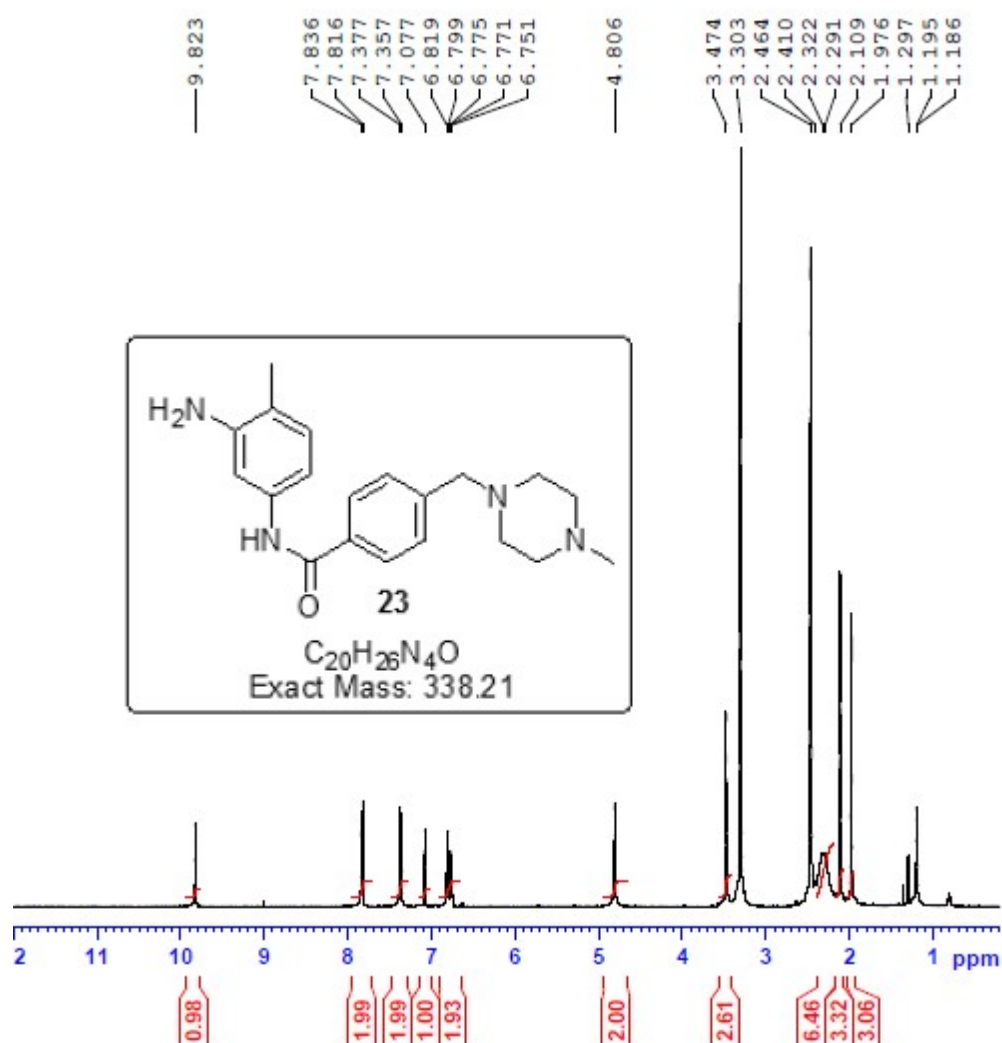

Figure S4: <sup>1</sup>H-NMR of Intermediate-23 (DMSO-*d*<sub>6</sub>)

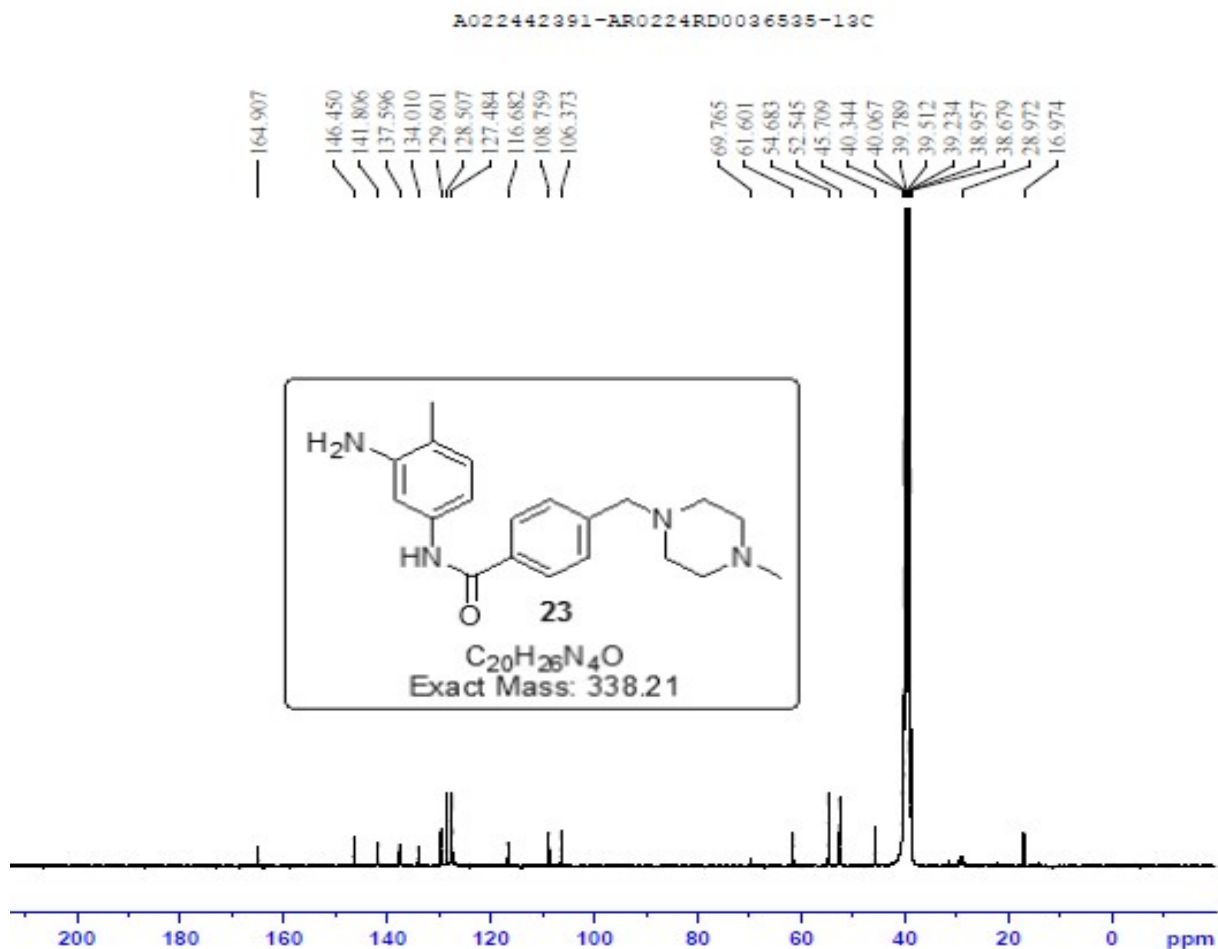

**Figure S5:  $^{13}C$ -NMR of Intermediate-23 (DMSO- $d_6$ )**

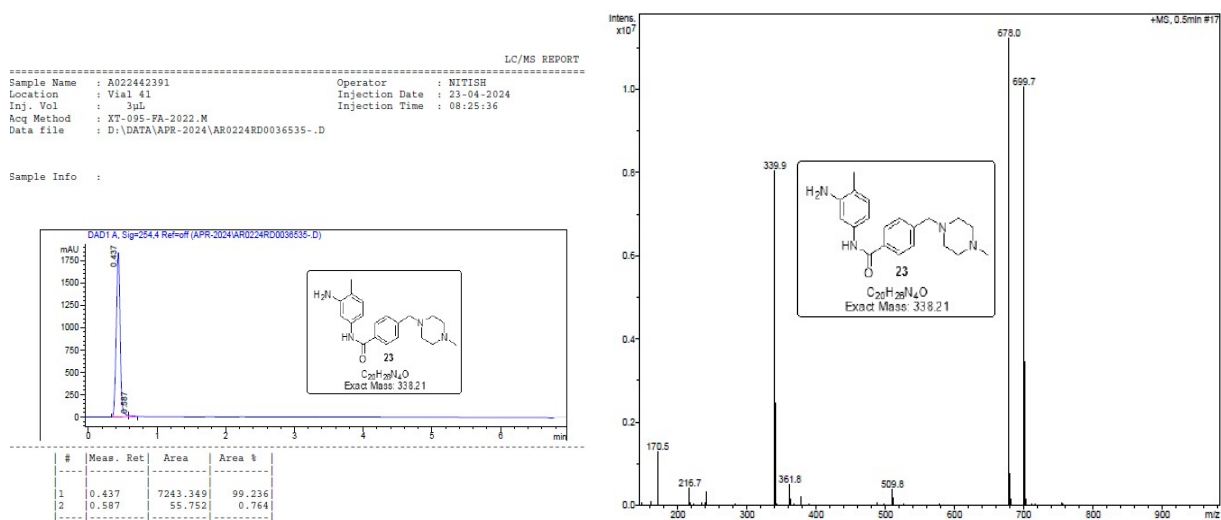

**Figure S6: LCMS of Intermediate-23**

A022444127-AR0224RD0057419

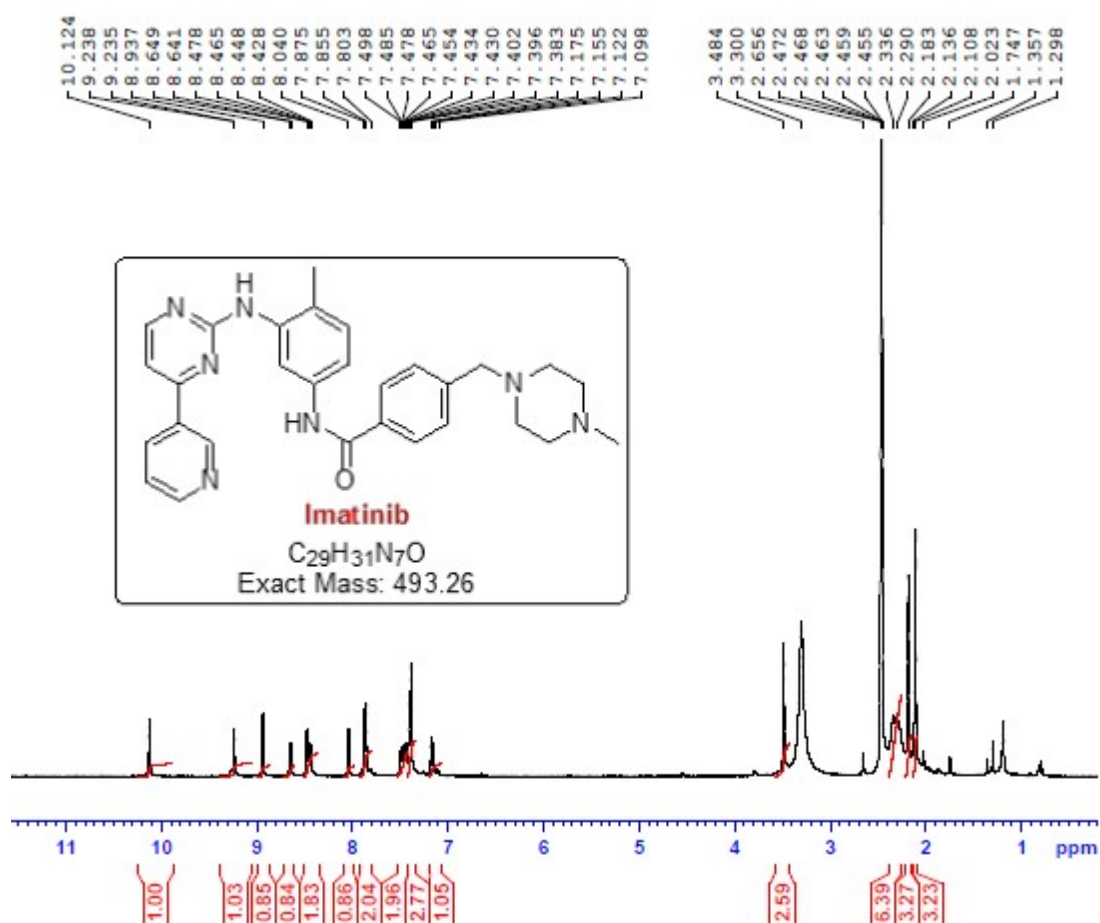

Figure S7:  $^1H$ -NMR of Imatinib ( $DMSO-d_6$ )

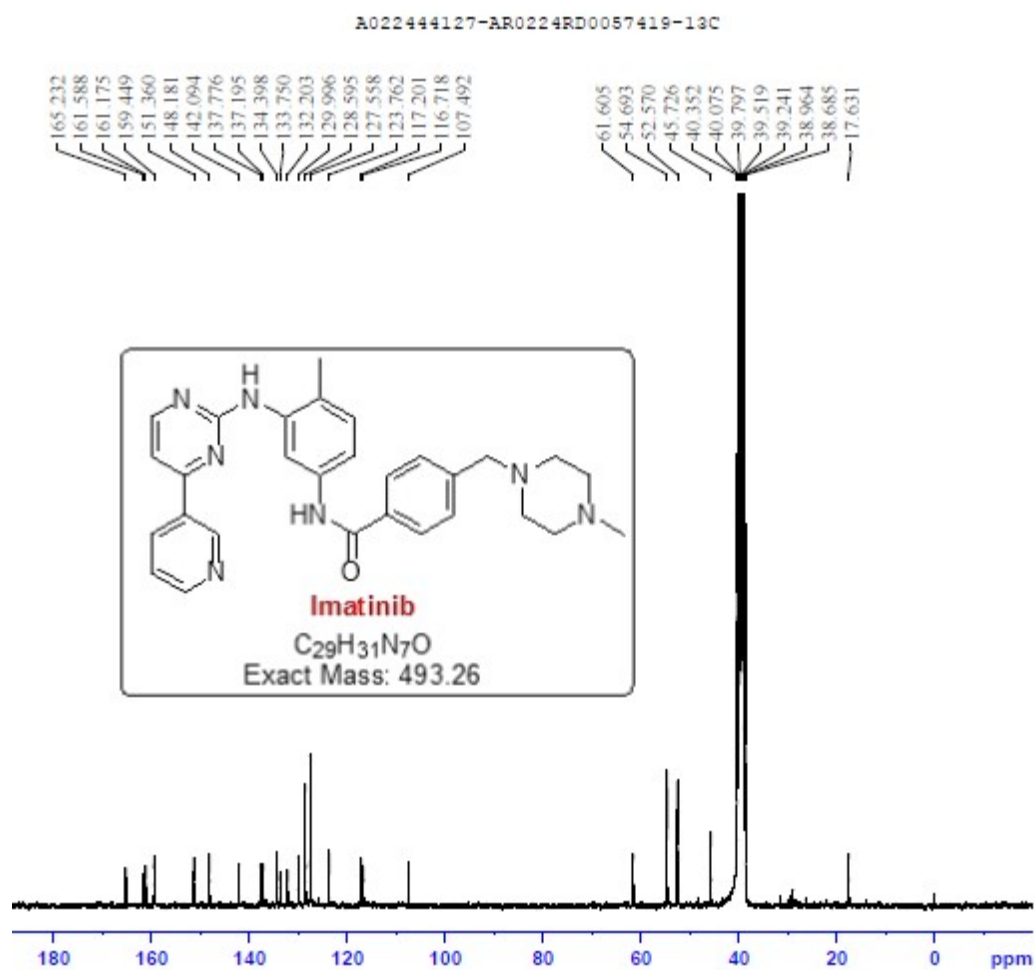

**Figure S8:  $^{13}C$ -NMR of Imatinib (DMSO- $d_6$ )**

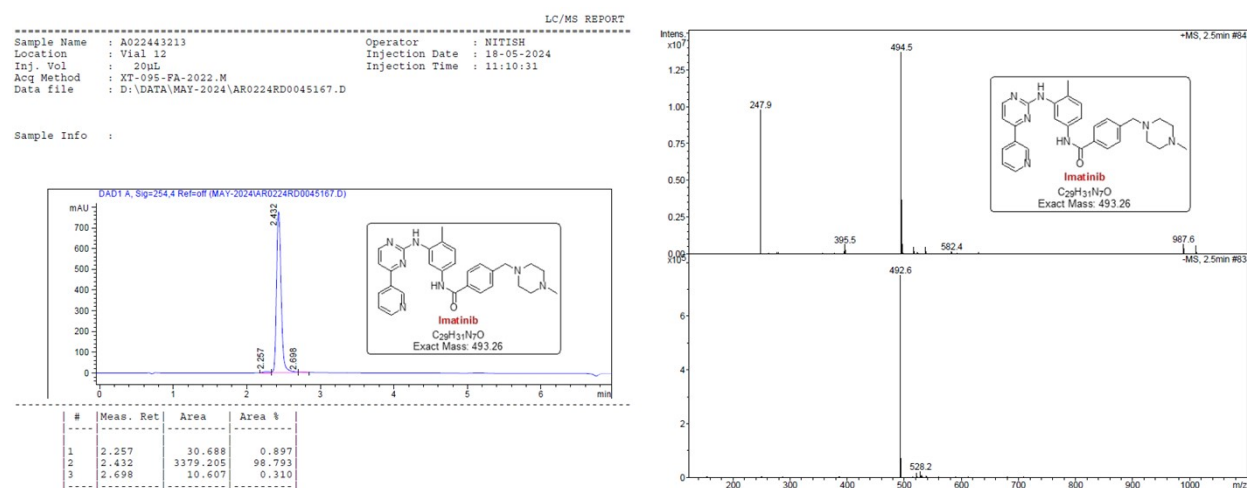

**Figure S9: LCMS of Imatinib**



**EcoScale calculation for synthesis of N-(4-Methyl-3-nitro-phenyl)-4-(4-methyl-piperazin-1-ylmethyl) benzamide (22): -**

**EcoScale** = 100 - sum of individual penalties

| #                                            | Parameters                   | Penalty points                                                                                                     | Value                 |
|----------------------------------------------|------------------------------|--------------------------------------------------------------------------------------------------------------------|-----------------------|
| 1.                                           | Yield                        | $(100 - \%yield)/2 = 100 - 75/2$                                                                                   | 12.5                  |
| 2.                                           | Price of reaction components | Expensive (> \$10 and < \$50)                                                                                      | 03                    |
| 3.                                           | Safety                       | N (dangerous for environment)                                                                                      | 05                    |
| 4.                                           | Technical setup              | Common setup                                                                                                       | 00                    |
| 5.                                           | Temperature/time             | Heating, > 1 h                                                                                                     | 03                    |
| 6.                                           | Workup and purification      | Cooling to room temperature,<br>Adding solvent(Water),<br>Simple filtration,<br>Removal of solvent with bp < 150°C | 01                    |
| Total penalty points                         |                              |                                                                                                                    | 24.5                  |
| EcoScale = 100 - sum of individual penalties |                              |                                                                                                                    | 100-24.5= <b>75.5</b> |

**E factor calculation for synthesis of N-(4-Methyl-3-nitro-phenyl)-4-(4-methyl-piperazin-1-ylmethyl) benzamide (22): -**

**E factor** = Raw materials- Final product/Final product

| #                                                                                        | Reagents                                                                  | Quantity      |
|------------------------------------------------------------------------------------------|---------------------------------------------------------------------------|---------------|
| 1.                                                                                       | 1-(4-Bromo-benzyl)-4-methyl-piperazine                                    | 5.0 g         |
| 2.                                                                                       | 4-Methyl-3-nitro-phenylamine                                              | 3.39 g        |
| 3.                                                                                       | N-tetrabutylamine hydrobromide                                            | 0.5 g         |
| 4.                                                                                       | 2,6 Lutidine                                                              | 3.22 g        |
| 5.                                                                                       | Tungsten hexacarbonyl                                                     | 6.53 g        |
| 6.                                                                                       | TPGS-750M                                                                 | 1.0 g         |
| 7.                                                                                       | [Bis(di-tert-butyl(4-dimethylaminophenyl)phosphine)dichloropalladium(II)] | 0.13 g        |
| <b>Total</b>                                                                             |                                                                           | <b>19.7 g</b> |
| <b>E factor</b> = Raw materials- Final product/Final product<br>= 19.7 g - 5.13 g/5.13 g |                                                                           | <b>2.84</b>   |

**EcoScale calculation Synthesis of N-(3-Amino-4-methyl-phenyl)-4-(4-methyl-piperazin-1-ylmethyl)-benzamide (23): -**

**EcoScale** = 100 - sum of individual penalties

| #                                            | Parameters                   | Penalty points                                                                                                                     | Value           |
|----------------------------------------------|------------------------------|------------------------------------------------------------------------------------------------------------------------------------|-----------------|
| 1.                                           | Yield                        | $(100 - \%yield)/2 = 100 - 90/2$                                                                                                   | 5               |
| 2.                                           | Price of reaction components | Expensive ( $> \$10$ and $< \$50$ )                                                                                                | 03              |
| 3.                                           | Safety                       | N (dangerous for environment)                                                                                                      | 05              |
| 4.                                           | Technical setup              | Common setup                                                                                                                       | 00              |
| 5.                                           | Temperature/time             | Heating, $> 1$ h                                                                                                                   | 01              |
| 6.                                           | Workup and purification      | Cooling to room temperature,<br>Adding solvent(Water),<br>Simple filtration,<br>Removal of solvent with bp $< 150^{\circ}\text{C}$ | 01              |
| Total penalty points                         |                              |                                                                                                                                    | 14              |
| EcoScale = 100 - sum of individual penalties |                              |                                                                                                                                    | $100 - 14 = 86$ |

**E factor calculation Synthesis of N-(3-Amino-4-methyl-phenyl)-4-(4-methyl-piperazin-1-ylmethyl)-benzamide (23): -**

**E factor** = Raw materials- Final product/Final product

| #                                                                                                                   | Reagents                                                                | Quantity     |
|---------------------------------------------------------------------------------------------------------------------|-------------------------------------------------------------------------|--------------|
| 1.                                                                                                                  | N-(4-Methyl-3-nitro-phenyl)-4-(4-methyl-piperazin-1-ylmethyl)-benzamide | 1.0 g        |
| 2.                                                                                                                  | Zinc dust                                                               | 0.88 g       |
| 3.                                                                                                                  | Ammonium chloride                                                       | 0.18 g       |
| 4.                                                                                                                  | TPGS-750M                                                               | 0.2 g        |
| <b>Total</b>                                                                                                        |                                                                         | <b>2.1 g</b> |
| <b>E factor</b> = Raw materials- Final product/Final product<br>= $2.1 \text{ g} - 0.83 \text{ g} / 0.83 \text{ g}$ |                                                                         | <b>1.5</b>   |

**EcoScale calculation Synthesis of N-(3-Amino-4-methyl-phenyl)-4-(4-methyl-piperazin-1-ylmethyl)-benzamide: -**

**EcoScale** = 100 - sum of individual penalties

| #                                            | Parameters                   | Penalty points                                                                                                     | Value                 |
|----------------------------------------------|------------------------------|--------------------------------------------------------------------------------------------------------------------|-----------------------|
| 1.                                           | Yield                        | $(100 - \%yield)/2 = 100 - 67/2$                                                                                   | 16.5                  |
| 2.                                           | Price of reaction components | Expensive (> \$10 and < \$50)                                                                                      | 03                    |
| 3.                                           | Safety                       | N (dangerous for environment)                                                                                      | 05                    |
| 4.                                           | Technical setup              | Common setup                                                                                                       | 00                    |
| 5.                                           | Temperature/time             | Heating, > 1 h                                                                                                     | 03                    |
| 6.                                           | Workup and purification      | Cooling to room temperature,<br>Adding solvent(Water),<br>Simple filtration,<br>Removal of solvent with bp < 150°C | 01                    |
| Total penalty points                         |                              |                                                                                                                    | 28.5                  |
| EcoScale = 100 - sum of individual penalties |                              |                                                                                                                    | 100-28.5= <b>71.5</b> |

**E factor calculation Synthesis of N-(3-Amino-4-methyl-phenyl)-4-(4-methyl-piperazin-1-ylmethyl)-benzamide: -**

**E factor** = Raw materials- Final product/Final product

| #                                                                                        | Reagents                                                                | Quantity      |
|------------------------------------------------------------------------------------------|-------------------------------------------------------------------------|---------------|
| 1.                                                                                       | N-(4-Methyl-3-nitro-phenyl)-4-(4-methyl-piperazin-1-ylmethyl)-benzamide | 0.8 g         |
| 2.                                                                                       | 2-Chloro-4-pyridin-3-yl-pyrimidine                                      | 0.45 g        |
| 3.                                                                                       | Acetic Acid                                                             | 5.0 g         |
| <b>Total</b>                                                                             |                                                                         | <b>6.25 g</b> |
| <b>E factor</b> = Raw materials- Final product/Final product<br>= 6.25 g - 0.78 g/0.78 g |                                                                         | <b>7.0</b>    |
